# Supplementary material
Source: Springer Nature journal article supplement (https://www.springermedizin.de/resource/supplementary/12958_2011_951_MOESM3_ESM.pdf/9566638)

FSH consumption

4000  
3000  
2000  
1000  
0

Group 0 = wild-type carriers  
Group 1 = heterozygotes  
Group 2 = homozygotes

Homozygotes

Heterozygotes

Wild-type

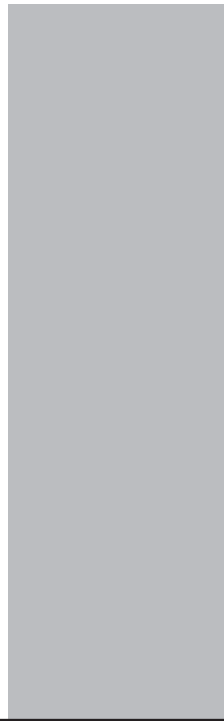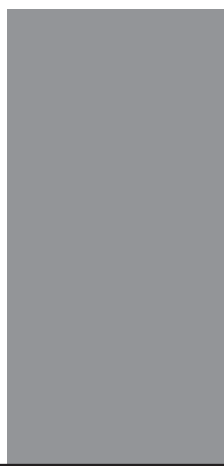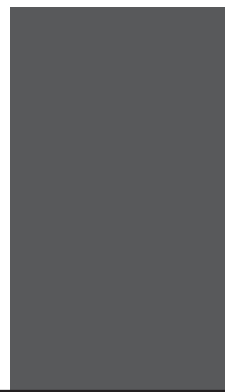

Supplement: MOESM3 [file 9566638]
